# Supplementary material for: Genomic Features and Comparative Genomic Analysis of novel Bacillus glycinifermentans strain JRCGR-1
Source: Research Square preprint supplement (doi:10.21203/rs.3.rs-902697/v1), 2021-09-16
Supplement: Supplementary file 1 [file e4a299bb6670e2178047fd33.docx]

| **Overall Statistics of orthologs** |  |
| --- | --- |
| Number of species | 20 |
| Number of genes | 88553 |
| Number of genes in orthogroups | 86639 |
| Number of unassigned genes | 1914 |
| Percentage of genes in orthogroups | 97.8 |
| Percentage of unassigned genes | 2.2 |
| Number of orthogroups | 6403 |
| Number of species-specific orthogroups | 1 |
| Number of genes in species-specific orthogroups | 2 |
| Percentage of genes in species-specific Orthogroups | 0 |
| Mean orthogroup size | 13.5 |
| Median orthogroup size | 16 |
| G50 (assigned genes) | 20 |
| G50 (all genes) | 20 |
| O50 (assigned genes) | 2049 |
| O50 (all genes) | 2097 |
| Number of orthogroups with all species present | 2561 |
| Number of single-copy orthogroups | 2347 |

**Table S4:** The overall statistics of orthologs. for the twenty *Bacillus* spp. used for comparative genomics.
